# Supplementary material for: The Incidence of IgG4-Related and Inflammatory Abdominal Aortic Aneurysm Is Rare in a 101 Patient Cohort
Source: MDPI journal article supplement (doi:10.3390/jcm12124029), 2023-06-13
Supplement: s1 [file s1]

## Supplement Material

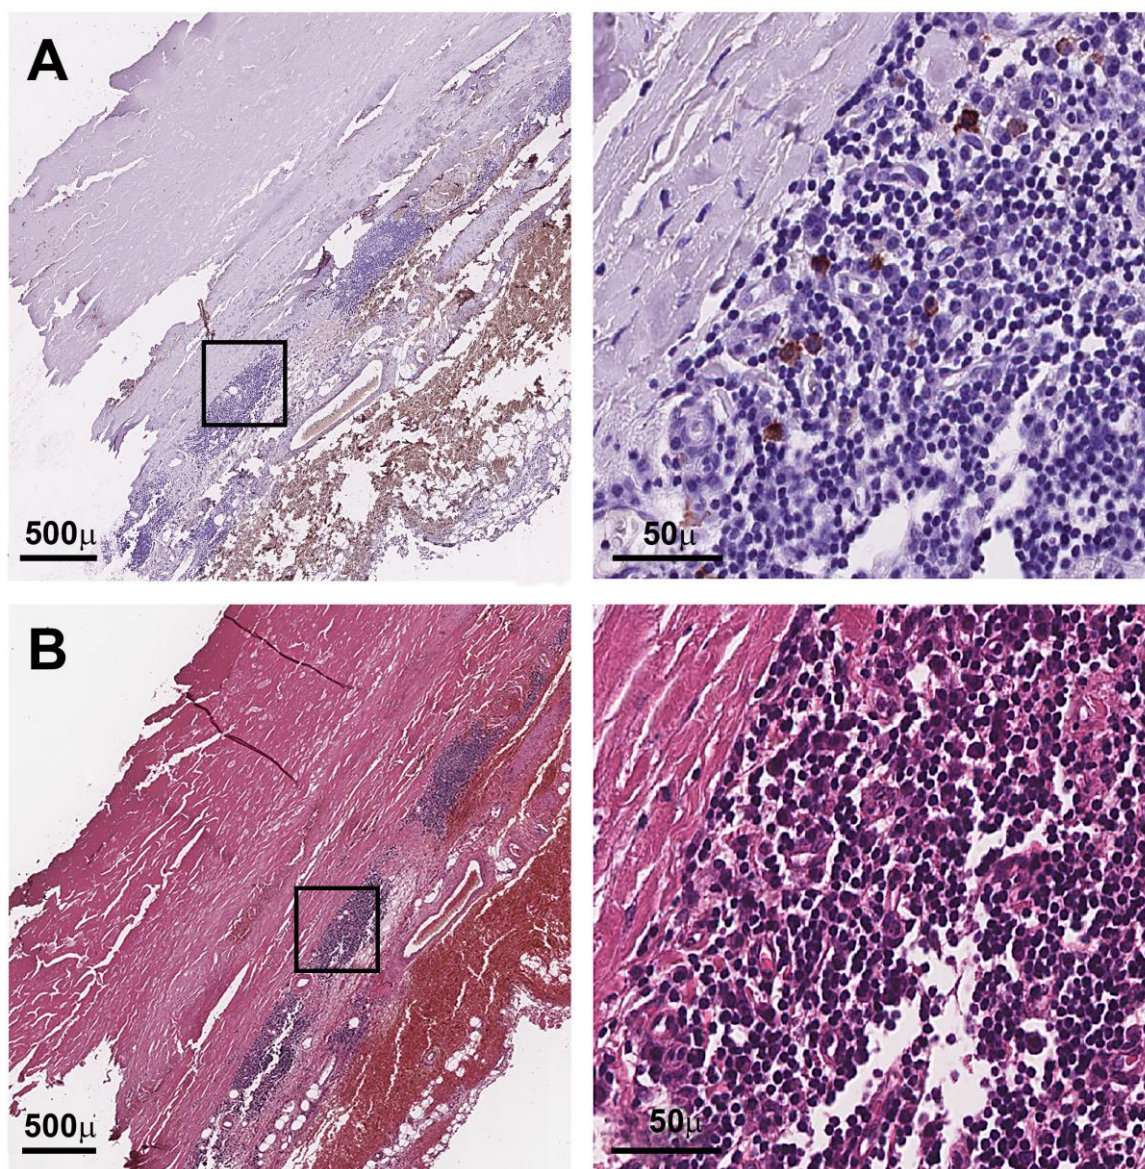

**Suppl. Figure S1: Additional example of IgG4 positive AAA staining:** (A) Overview and close up of IgG4-immunostaining from additional patients with positivity score 1. (B) Corresponding overview and close up of HE staining. (scale bar 200μm, 50μm respectively, all photos lumen oriented upwards).



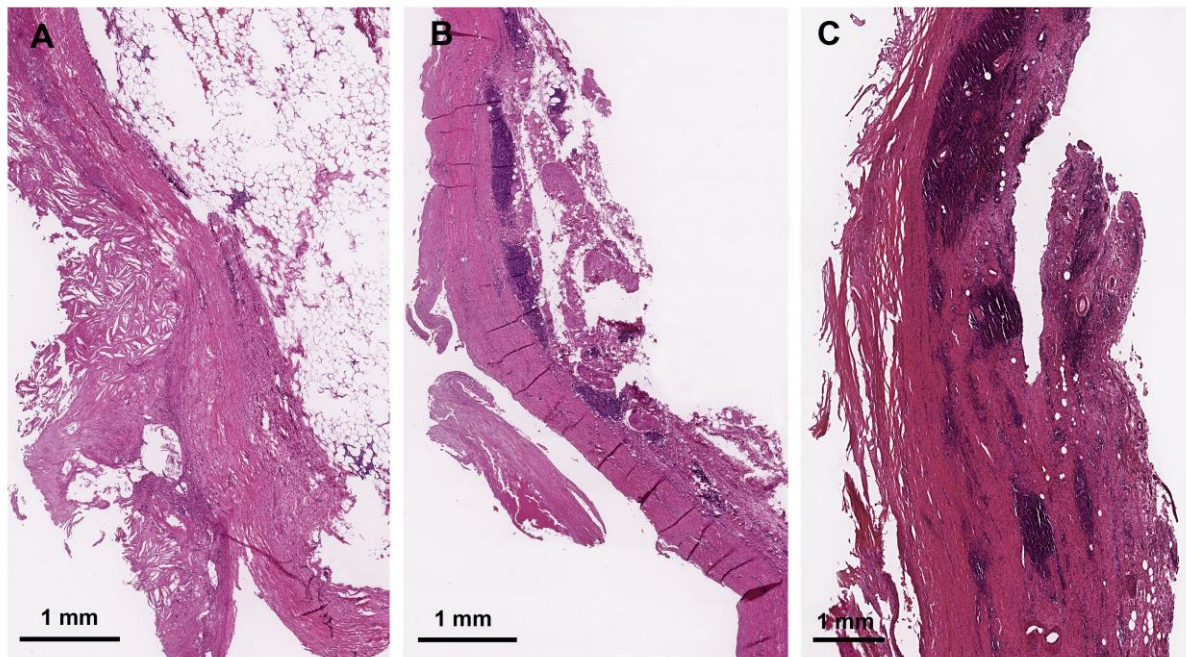

**Suppl. Figure S2: Degree of inflammation in AAA vessel wall. (A)** No to very low level of infiltrate. **(B)** Intermediate level of infiltrate. **(C)** High levels of inflammatory infiltrate (scale bar 1mm; lumen oriented sideways; HE staining).

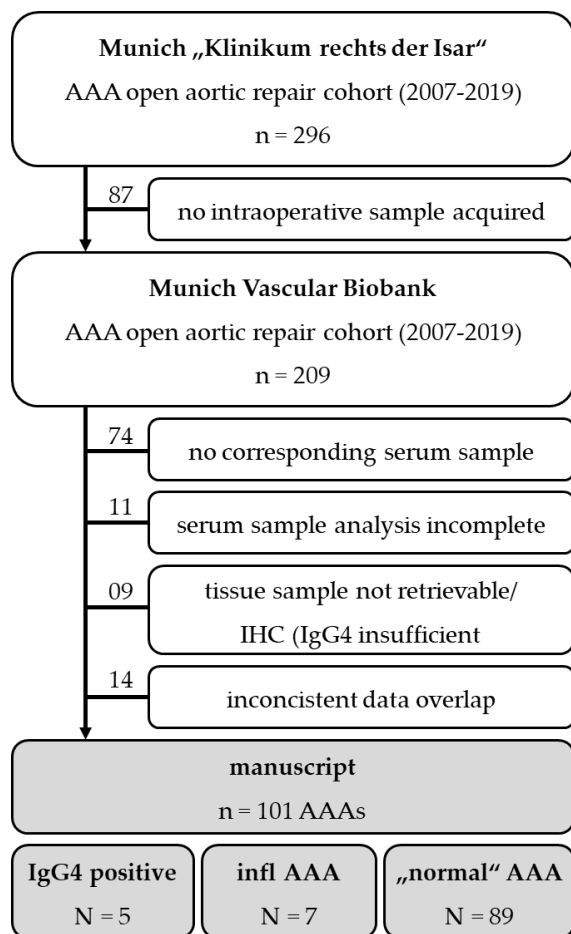

**Suppl. Figure S3: Inclusion flow chart.**

|                                                |              | patient cohort | IgG4 positive AAA | inflammatory AAA |
|------------------------------------------------|--------------|----------------|-------------------|------------------|
|                                                |              | N=101          | N=5               | N=7              |
| <b>AAA characteristics</b>                     |              |                |                   |                  |
| growt                                          | slow         | 10 (9.9)       | 2 (40)            | 1 (14.3)         |
|                                                | intermediate | 22 (21.8)      | 0                 | 3 (42.9)         |
|                                                | fast         | 13 (12.9)      | 0                 | 0                |
| <b>procedural details and clinical outcome</b> |              |                |                   |                  |
| surgical complication                          |              | 20 (19.8)      | 1 (20)            | 2 (28.6)         |
| SSI                                            |              | 12 (11.9)      | 1 (20)            | 1 (14.3)         |
| leg ischemia                                   |              | 7 (6.9)        | 0                 | 1 (14.3)         |
| bleeding                                       |              | 5 (5)          | 0                 | 0                |
| bowel ischemia                                 |              | 1 (1)          | 0                 | 0                |
| medical complication                           |              | 40 (39.6)      | 2 (40)            | 1 (14.3)         |
| urinary tract infection                        |              | 7 (6.9)        | 1 (20)            | 0                |
| acute kidney failure                           |              | 11 (10.9)      | 0                 | 0                |
| ischemic colitis                               |              | 5 (5)          | 0                 | 0                |
| myocardial infarction                          |              | 3 (3)          | 0                 | 0                |
| stroke                                         |              | 1 (1)          | 0                 | 0                |
| lung edema                                     |              | 7 (6.9)        | 1 (20)            | 0                |
| pneumonia                                      |              | 11 (10.9)      | 0                 | 1 (14.3)         |
| other                                          |              | 2 (2)          | 0                 | 0                |

**Suppl. Table S1: Additional AAA characteristics and short-term clinical outcomes.** SSI = surgical site infection. Continuous variables are shown as mean  $\pm$  one standard deviation (SD). Categorical variables are shown as absolute number and percentage.
